# Supplementary material
Source: Research Square preprint supplement (doi:10.21203/rs.3.rs-9397441/v1)
Supplement: Supplementary file 1 [file 4253b772898204058368e7c7.docx]

**Table 4. Temporal Trends and COVID-19 Pandemic Impact**

| **Year** | **Complication Rate (%)** |
| --- | --- |
| 2017-18 | | 6.03* |
| 2018-19 | | 9.51 |
| 2019-20 | | 9.65 |
| 2020-21 | | 8.86 |
| 2021-22 | | 7.70 |
| 2022-23 | | 7.60 |

**Impacted by small sample size (partial year)*

| **COVID-19 Period** | **Date Range** | **Complication Rate (%)** |
| --- | --- | --- |
| Pre-COVID-19 | 10/1/2017 - 3/31/2020 | 8.32 |
| Early COVID-19 Surge** | 4/1/2020 - 6/1/2020 | 10.53 |
| Early post-COVID-19 | 6/2/2020 - 11/10/2021 | 8.94 |
| Post-COVID-19 | 11/11/2021 - 3/31/2023 | 7.68 |

**Early COVID-19 surge period reflects emergency cases only
