# Supplementary material
Source: Research Square preprint supplement (doi:10.21203/rs.3.rs-9397441/v1)
Supplement: Supplementary file 2 [file 5d336633b9676a5d59984197.docx]

**Supplemental Materials: Complications as Defined By ICD-10 Diagnostic Codes and Code Sets**

| **Organ System** | **Code** | **Description** |
| --- | --- | --- |
| **Brain** | G93.1 | Anoxic brain injury |
|  | G93.6 | Cerebral edema |
|  | I63.9 | Cerebral infarction unspecified |
|  | G93.40 | Encephalopathy |
|  | I69.959 | Hemiplegia or hemiparesis following cerebral infarction |
|  | G93.41 | Metabolic Encephalopathy |
|  | G92 | Toxic encephalopathy |
|  | G45.9 | Transient Ischemic Attack (TIA) |
|  |  |  |
| **Heart** | I50.31 | Acute diastolic congestive heart failure |
|  | I24.9 | Acute ischemic heart disease unspecified |
|  | I21.9 | Acute myocardial infarction |
|  | I50.813 | Acute on chronic right heart failure |
|  | I50.43 | Acute on chronic systolic congestive heart failure |
|  | I50.23 | Acute on chronic systolic congestive heart failure |
|  | I50.811 | Acute right heart failure |
|  | I50.21 | Acute systolic heart failure |
|  | I46.9 | Cardiac arrest |
|  | I49.1 | Cardiac arrythmia unspecified |
|  | I31.4 | Cardiac tamponade |
|  | R57.0 | Cardiogenic shock |
|  | I42.9 | Cardiomyopathy unspecified |
|  | I44.2 | Complete AV block |
|  | I42.9 | Heart failure unspecified |
|  | I16.1 | Hypertensive emergency |
|  | I11.0 | Hypertensive heart disease with heart failure |
|  | I95.9 | Hypotension |
|  | R57.1 | Hypovolemic shock |
|  | I25.5 | Ischemic cardiomyopathy |
|  | I21.4 | Non-ST-elevation myocardial infarction |
|  | T81.19XA | Other Post procedural shock initial encounter |
|  | I48.0 | Paroxysmal Atrial Fibrillation |
|  | I44.1 | Second degree AV block |
|  | I49.5 | Sick sinus syndrome |
|  | I47.1 | Supraventricular tachycardia |
|  | R55 | Syncope and collapse |
|  | R00.0 | Tachycardia unspecified |
|  | I48.91 | Unspecified atrial fibrillation |
|  | I48.92 | Unspecified atrial flutter |
|  | I50.30 | Unspecified diastolic congestive heart failure |
|  | I50.20 | Unspecified systolic heart failure |
|  | I49.01 | Ventricular fibrillation |
|  | I47.2 | Ventricular tachycardia |
|  |  |  |
| **Lungs** | J96.20 | Acute and chronic respiratory failure |
|  | J96.22 | Acute and chronic respiratory failure with hypercapnia |
|  | J96.21 | Acute and chronic respiratory failure with hypoxia |
|  | J20.9 | Acute Bronchitis unspecified |
|  | J95.821 | Acute postprocedural respiratory failure |
|  | J81.0 | Acute pulmonary edema |
|  | J96.00 | Acute Respiratory failure |
|  | J96.02 | Acute respiratory failure with hypercapnia |
|  | J96.01 | Acute respiratory failure with hypoxia |
|  | J80 | ARDS |
|  | J69.0 | Aspiration pneumonitis |
|  | J45.901 | Asthma with acute exacerbation |
|  | J98.11 | Atelectasis |
|  | J44.1 | Chronic obstructive pulmonary disease w (acute) exacerbation. |
|  | Z99.11 | Dependence on ventilator |
|  | R04.9 | Hemorrhage from respiratory passage |
|  | J94.2 | Hemothorax |
|  | R09.02 | Hypoxemia |
|  | J18.1 | Lobar pneumonia |
|  | J90 | Pleural effusion not elsewhere classified |
|  | J18.9 | Pneumonia unspecified organism |
|  | J93.9 | Pneumothorax unspecified |
|  | R09.2 | Respiratory arrest |
|  | J96.92 | Respiratory failure unspecified with hypercapnia |
|  | J96.90 | Respiratory failure unspecified with hypoxia or hypercapnia |
|  | R06.02 | Shortness of breath |
|  | R06.82 | Tachypnea |
|  |  |  |
| **Kidneys** | N17.9 | Acute kidney failure |
|  | N17.1 | Acute kidney failure with cortical necrosis |
|  | N17.2 | Acute kidney failure with medullary necrosis |
|  | N17.0 | Acute kidney failure with tubular necrosis |
|  | N17.8 | Other acute kidney failure |
|  | O90.4 | Post partum acute kidney failure |
|  | N99.0 | Post procedural acute kidney failure |
|  | N19 | Unspecified kidney failure |
|  |  |  |
| **Vascular Volume** | E87.70 | Fluid overload unspecified |
|  | R57.1 | Hypovolemic shock |
|  |  |  |
| **SIRS and Sepsis** | A41.9 | Sepsis unspecified organism |
|  | R65.21 | Severe sepsis with septic shock |
|  | R65.20 | Severe sepsis without septic shock |
|  | R65.11 | SIRS non-infectious with acute organ dysfunction |
|  | R65.10 | SIRS non-infectious without acute organ dysfunction |
|  |  |  |
| **Other related to blood** | D64.9 | Anemia |
|  | K66.1 | Hemoperitoneum |
|  | J94.2 | Hemothorax |
|  |  |  |
| **Other** | R20.0 | Anesthesia of skin |
|  | S05.02 | Corneal abrasion left eye |
|  | S05.01 | Corneal abrasion right eye |
|  | S05.00XA | Corneal abrasion unspecified |
|  | M62.81 | Muscle weakness |
|  | R11.2 | Nausea and vomiting |
|  | R11.10 | Vomiting unspecified |

Agency for Healthcare Research and Quality (AHRQ) Patient Safety Indicators Technical Specifications Updates - Version v2018 and v2018.0.1 (ICD 10), June 2018

***Iatrogenic pneumothorax diagnosis codes: (IATROID)***

Code Description

J95811 Postprocedural Pneumothorax

***Central venous catheter-related blood stream infection diagnosis codes: (IDTMC3D)***

Code Description

T80211A Bloodstream infection due to central venous catheter, initial encounter

***Perioperative hemorrhage or hematoma diagnosis codes: (POHMRI2D)***

**Spleen**

| **Code** | **Description** |
| --- | --- |
| D7821 | Postprocedural hemorrhage of the spleen following a procedure on the spleen |
| D7822 | Postprocedural hemorrhage of the spleen following other procedure |
| D7831 | Postprocedural hematoma of the spleen following a procedure on the spleen |
| D7832 | Postprocedural hematoma of the spleen following other procedure |

**Endocrine System**

| **Code** | **Description** |
| --- | --- |
| E89810 | Postprocedural hemorrhage of an endocrine system organ or structure following an endocrine system procedure |
| E89811 | Postprocedural hemorrhage of an endocrine system organ or structure following other procedure |
| E89820 | Postprocedural hematoma of an endocrine system organ or structure following an endocrine system procedure |
| E89821 | Postprocedural hematoma of an endocrine system organ or structure following other procedure |

**Nervous System**

| **Code** | **Description** |
| --- | --- |
| G9751 | Postprocedural hemorrhage of a nervous system organ or structure following a nervous system procedure |
| G9752 | Postprocedural hemorrhage of a nervous system organ or structure following other procedure |
| G9761 | Postprocedural hematoma of a nervous system organ or structure following a nervous system procedure |
| G9762 | Postprocedural hematoma of a nervous system organ or structure following other procedure |

**Eye and Adnexa**

| **Code** | **Description** |
| --- | --- |
| H59311 | Postprocedural hemorrhage of right eye and adnexa following an ophthalmic procedure |
| H59312 | Postprocedural hemorrhage of left eye and adnexa following an ophthalmic procedure |
| H59313 | Postprocedural hemorrhage of eye and adnexa following an ophthalmic procedure, bilateral |
| H59319 | Postprocedural hemorrhage of unspecified eye and adnexa following an ophthalmic procedure |
| H59321 | Postprocedural hemorrhage of right eye and adnexa following other procedure |
| H59322 | Postprocedural hemorrhage of left eye and adnexa following other procedure |
| H59323 | Postprocedural hemorrhage of eye and adnexa following other procedure, bilateral |
| H59329 | Postprocedural hemorrhage of unspecified eye and adnexa following other procedure |
| H59331 | Postprocedural hematoma of right eye and adnexa following an ophthalmic procedure |
| H59332 | Postprocedural hematoma of left eye and adnexa following an ophthalmic procedure |
| H59333 | Postprocedural hematoma of eye and adnexa following an ophthalmic procedure, bilateral |
| H59339 | Postprocedural hematoma of unspecified eye and adnexa following an ophthalmic procedure |
| H59341 | Postprocedural hematoma of right eye and adnexa following other procedure |
| H59342 | Postprocedural hematoma of left eye and adnexa following other procedure |
| H59343 | Postprocedural hematoma of eye and adnexa following other procedure, bilateral |
| H59349 | Postprocedural hematoma of unspecified eye and adnexa following other procedure |

**Ear and Mastoid Process**

| **Code** | **Description** |
| --- | --- |
| H9541 | Postprocedural hemorrhage of ear and mastoid process following a procedure on the ear and mastoid process |
| H9542 | Postprocedural hemorrhage of ear and mastoid process following other procedure |
| H9551 | Postprocedural hematoma of ear and mastoid process following a procedure on the ear and mastoid process |
| H9552 | Postprocedural hematoma of ear and mastoid process following other procedure |

**Circulatory System**

| **Code** | **Description** |
| --- | --- |
| I97610 | Postprocedural hemorrhage of a circulatory system organ or structure following a cardiac catheterization |
| I97611 | Postprocedural hemorrhage of a circulatory system organ or structure following cardiac bypass |
| I97618 | Postprocedural hemorrhage of a circulatory system organ or structure following other circulatory system procedure |
| I9762 | Postprocedural hemorrhage and hematoma of a circulatory system organ or structure following other procedure |
| I97620 | Postprocedural hemorrhage of a circulatory system organ or structure following other procedure |
| I97621 | Postprocedural hematoma of a circulatory system organ or structure following other procedure |
| I97630 | Postprocedural hematoma of a circulatory system organ or structure following a cardiac catheterization |
| I97631 | Postprocedural hematoma of a circulatory system organ or structure following cardiac bypass |
| I97638 | Postprocedural hematoma of a circulatory system organ or structure following other circulatory system procedure |

**Respiratory System**

| **Code** | **Description** |
| --- | --- |
| J95830 | Postprocedural hemorrhage of a respiratory system organ or structure following a respiratory system procedure |
| J95831 | Postprocedural hemorrhage of a respiratory system organ or structure following other procedure |
| J95860 | Postprocedural hematoma of a respiratory system organ or structure following a respiratory system procedure |
| J95861 | Postprocedural hematoma of a respiratory system organ or structure following other procedure |

**Digestive System**

| **Code** | **Description** | | |
| --- | --- | --- | --- |
| K91840 | | | Postprocedural hemorrhage of a digestive system organ or structure following a digestive system procedure |
| K91841 | | | Postprocedural hemorrhage of a digestive system organ or structure following other procedure |
| K91870 | | | Postprocedural hematoma of a digestive system organ or structure following a digestive system procedure |
| K91871 | | | Postprocedural hematoma of a digestive system organ or structure following other procedure |

**Skin and Subcutaneous Tissue**

| **Code** | **Description** |
| --- | --- |
| L7621 | Postprocedural hemorrhage of skin and subcutaneous tissue following a dermatologic procedure |
| L7622 | Postprocedural hemorrhage of skin and subcutaneous tissue following other procedure |
| L7631 | Postprocedural hematoma of skin and subcutaneous tissue following a dermatologic procedure |
| L7632 | Postprocedural hematoma of skin and subcutaneous tissue following other procedure |

**Musculoskeletal System**

| **Code** | **Description** |
| --- | --- |
| M96830 | Postprocedural hemorrhage of a musculoskeletal structure following a musculoskeletal system procedure |
| M96831 | Postprocedural hemorrhage of a musculoskeletal structure following other procedure |
| M96840 | Postprocedural hematoma of a musculoskeletal structure following a musculoskeletal system procedure |
| M96841 | Postprocedural hematoma of a musculoskeletal structure following other procedure |

**Genitourinary System**

| **Code** | **Description** |
| --- | --- |
| N99820 | Postprocedural hemorrhage of a genitourinary system organ or structure following a  genitourinary system procedure |
| N99821 | Postprocedural hemorrhage of a genitourinary system organ or structure following other.  procedure |
| N99840 | Postprocedural hematoma of a genitourinary system organ or structure following a  genitourinary system procedure |
| N99841 | Postprocedural hematoma of a genitourinary system organ or structure following other  procedure |

**Acute Kidney Failure Diagnosis Codes (PHYSIDB)**

| **Code** | **Description** |
| --- | --- |
| **N170** | Acute kidney failure with tubular necrosis |
| **N171** | Acute kidney failure with acute cortical necrosis |
| **N172** | Acute kidney failure with medullary necrosis |
| **N178** | Other acute kidney failure |
| **N179** | Acute kidney failure, unspecified |
| **N19** | Unspecified kidney failure |
| **N990** | Postprocedural (acute) (chronic) kidney failure |

**Acute respiratory failure diagnosis codes: (ACURF2D)**

**Code Description**

J95821 Acute postprocedural respiratory failure

J95822 Acute and chronic postprocedural respiratory failure

Postoperative Sepsis

| **Code** | **Description** |
| --- | --- |
| A021 | Salmonella sepsis |
| A227 | Anthrax sepsis |
| A267 | Erysipelothrix sepsis |
| A327 | Listerial sepsis |
| A400 | Sepsis due to Streptococcus, group A |
| A401 | Sepsis due to Streptococcus, group B |
| A403 | Sepsis due to Streptococcus pneumoniae |
| A408 | Other streptococcal sepsis |
| A409 | Streptococcal sepsis, unspecified |
| A4101 | Sepsis due to Methicillin susceptible Staphylococcus aureus |
| A4102 | Sepsis due to Methicillin resistant Staphylococcus aureus |
| A411 | Sepsis due to other specified Staphylococcus |
| A412 | Sepsis due to unspecified Staphylococcus |
| A413 | Sepsis due to Hemophilus influenzae |
| A414 | Sepsis due to anaerobes |
| A4150 | Gram-negative sepsis, unspecified |
| A4151 | Sepsis due to Escherichia coli [E. coli] |
| A4152 | Sepsis due to Pseudomonas |
| A4153 | Sepsis due to Serratia |
| A4159 | Other Gram-negative sepsis |
| A4181 | Sepsis due to Enterococcus |
| A4189 | Other specified sepsis |
| A419 | Sepsis, unspecified organism |
| A427 | Actinomycotic sepsis |
| A5486 | Gonococcal sepsis |
| B377 | Candidal sepsis |
| R6520 | Severe sepsis without septic shock |
| R6521 | Severe sepsis with septic shock |
| T8112XA | Postprocedural septic shock, initial encounter |
